# Supplementary material for: X-ray Structure and Molecular Dynamics Simulations of Endoglucanase 3 from Trichoderma harzianum: Structural Organization and Substrate Recognition by Endoglucanases That Lack Cellulose Binding Module
Source: PLOS journal article supplement (doi:10.1371/journal.pone.0059069), 2013-03-14
Supplement: S3 (10.1371/journal.pone.0059069.s003) [file journal.pone.0059069.s003]

**Table S1:** Frequencies of hydrophobic contacts and hydrogen bonds in the simulations of ThEG3-pt\* and CfCBM-pt. Only frequencies above 8% are shown.

|                  |                                 |        |        |        |        |
|------------------|---------------------------------|--------|--------|--------|--------|
| <b>ThEG3-pt*</b> | <b>Hydrophobic Contacts / %</b> |        |        |        |        |
|                  | Trp23                           | Ile131 | Tyr112 | Phe203 | Val58  |
|                  | 100                             | 100    | 99     | 98     | 94     |
|                  | Tyr61                           | Ile128 | Tyr7   | Phe102 | Trp121 |
|                  | 94                              | 72     | 67     | 42     | 19     |
| <b>CfCBM-pt</b>  | <b>Hydrogen Bonds / %</b>       |        |        |        |        |
|                  | Gly129                          | Glu201 | Asn21  | Asn152 |        |
|                  | 41                              | 36     | 26     | 17     |        |
|                  | <b>Hydrophobic Contacts / %</b> |        |        |        |        |
|                  | Tyr19                           | Val17  | Val48  | Tyr43  | Tyr85  |
| <b>CfCBM-pt</b>  | 100                             | 100    | 98     | 100    | 98     |
|                  | <b>Hydrogen Bonds / %</b>       |        |        |        |        |
|                  | Gln124                          | Asn81  | Ala18  | Arg75  |        |
|                  | 37                              | 33     | 34     | 29     |        |

#### **Hydrophobic contact:**

It was considered that the hydrophobic contacts exist if the distances between carbon atoms in the lateral chains of hydrophobic residues (Val, Leu, Met, Ile, Pro, Trp, Phe and Tyr) and atoms in glycosidic rings “backbone” are smaller than 5 Å.

#### **Hydrogen bonding:**

The adopted criteria to consider a hydrogen bond were  $D-A$  distance less than 3 Å,  $D-H-A$  angle less than 20°, being  $D$ , the donor and  $A$ , the acceptor of proton.
